# Supplementary material
Source: PubMed Central journal article supplement (PMC4189003)
Supplement: supp_O114.041616_mcp.O114.041616-4.pdf [file supp_O114.041616_mcp.O114.041616-4.pdf]

*SUPPLEMENTARY FIGURES*

## **Broad range glycosidase activity profiling**

Balakumaran Chandrasekar<sup>1,2</sup>, Tram Ngoc Hong<sup>1,2</sup>, Thomas Colby<sup>3</sup>, Asif Emran Khan Emon<sup>2</sup>, Jianbing Jiang<sup>4</sup>, Joji Grace Villamor<sup>2</sup>, Anne Harzen<sup>3</sup>, Herman S. Overkleeft<sup>4\*</sup> and Renier A. L. van der Hoorn<sup>1\*</sup>

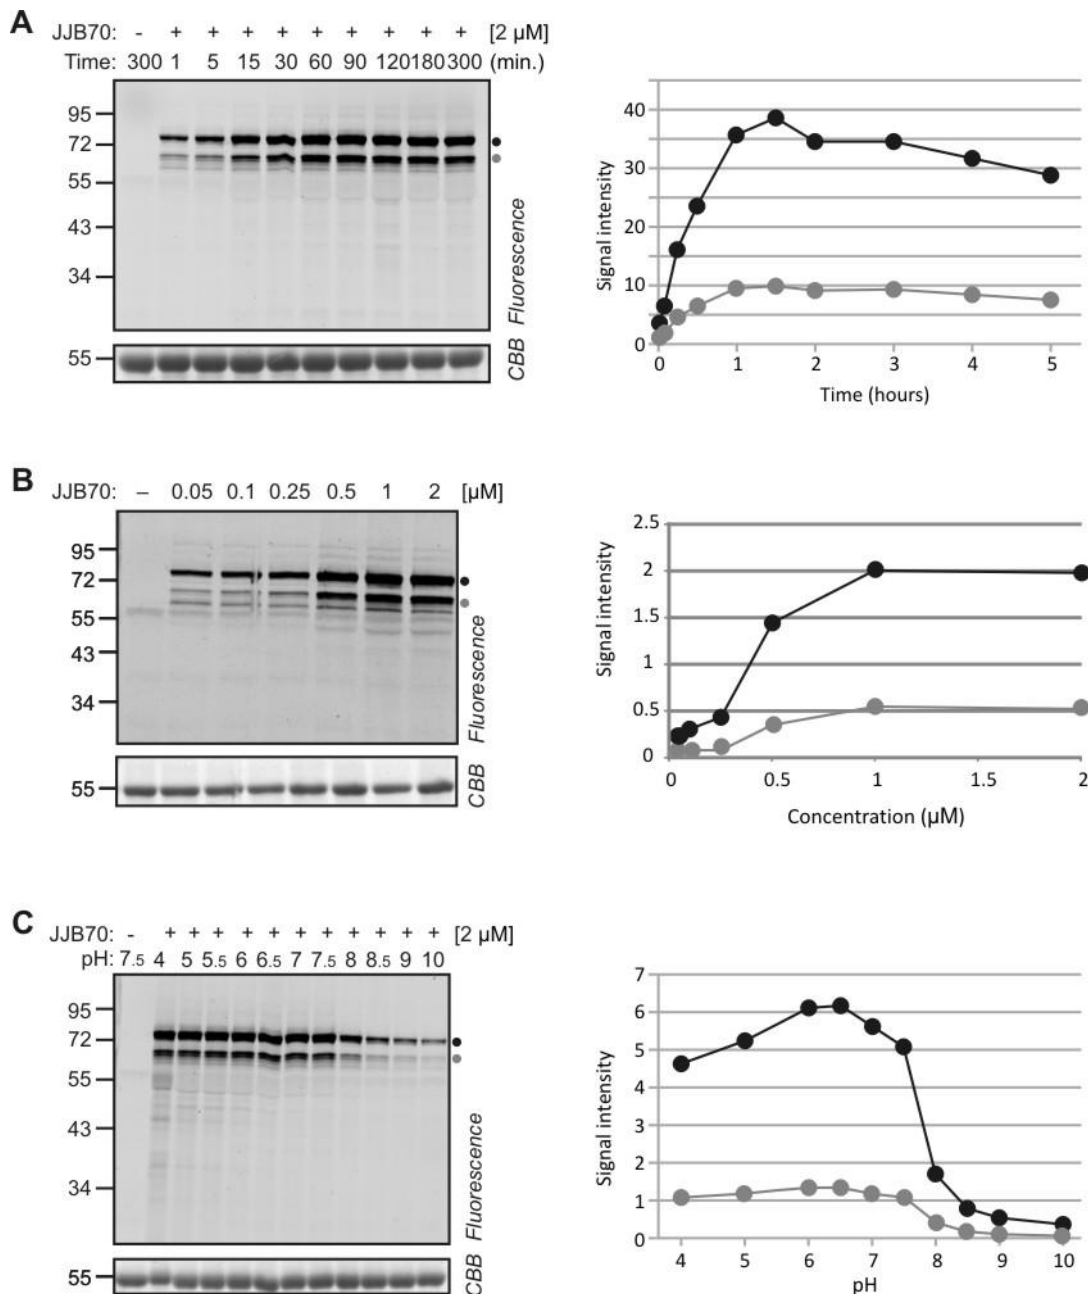

FIG. S1. **Conditions affecting myrosinase labeling with JJB70.**

A, Labeling occurs within one hour. Leaf extracts containing  $\sim 1.5$  mg/ml total soluble proteins were incubated at pH 7.5 with 2  $\mu$ M JJB70 and protein samples were collected at various time points. B, Labeling reaches saturation at 1  $\mu$ M JJB70. Leaf extracts were incubated at pH 7.5 with 0.05-2  $\mu$ M of JJB70. C, Labeling is optimal at slightly acidic pH. Leaf extracts were incubated with 2  $\mu$ M JJB70 at pH 4-10 for 1 h. (A-C) Labeled proteins were detected by in-gel fluorescent scanning. The fluorescence was quantified and plotted against labeling time, probe concentration and pH. The gel was stained with coomassie to show the equal loading. Two major signals are indicated by grey and black circles.

**A**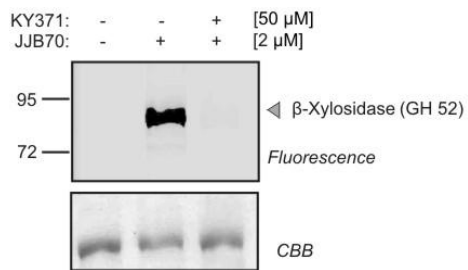**B**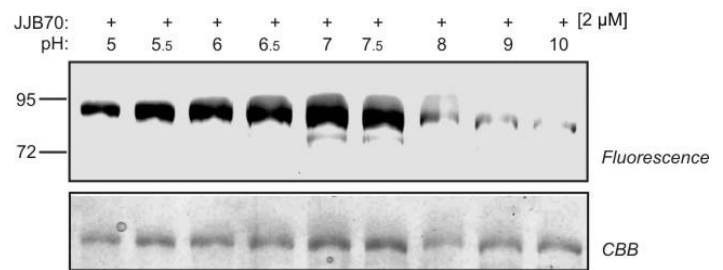

**FIG. S2. JJB70 labels a characterized GH52  $\beta$ -D-xylosidase.**

*A*, Labeling of a commercially available  $\beta$ -D-xylosidase from the soil bacterium *Opitutus terrae*. 3  $\mu$ g of purified  $\beta$ -D Xylosidase was pre-incubated with and without 50  $\mu$ M KY371 for 30 min and labeled with 2  $\mu$ M JJB70 for 1 h at pH 6.5. *B*, Labeling is optimal at neutral pH. 3  $\mu$ g of  $\beta$ -D-xylosidase was incubated with 2  $\mu$ M JJB70 at pH 5-10 for 1 h. The labeled protein was detected by in-gel fluorescent scanning. CBB, Coomassie-Brilliant Blue.
